## 1 **A de novo paradigm for male infertility**

2 Oud MS<sup>1\*</sup>, Smits RM<sup>2\*</sup>, Smith HE<sup>3\*</sup>, Mastrorosa FK<sup>3</sup>, Holt GS<sup>3</sup>, Houston BJ<sup>4</sup>, de Vries PF<sup>1</sup>, Alobaidi BKS<sup>3</sup>, Batty LE<sup>3</sup>,  
3 Ismail H<sup>3</sup>, Greenwood J<sup>5</sup>, Sheth H<sup>6</sup>, Mikulasova A<sup>3</sup>, Astuti GDN<sup>7,8</sup>, Gilissen C<sup>7</sup>, McEleny K<sup>9</sup>, Turner H<sup>10</sup>, Coxhead  
4 J<sup>11</sup>, Cockell S<sup>12</sup>, Braat DDM<sup>2</sup>, Fleischer K<sup>2,13</sup>, D'Hauwers KWM<sup>14</sup>, Schaafsma E<sup>15</sup>, GEMINI Consortium, Nagirnjaja  
5 L<sup>16</sup>, Conrad DF<sup>16</sup>, Friedrich C<sup>17</sup>, Kliesch S<sup>18</sup>, Aston KI<sup>19</sup>, Riera-Escamilla A<sup>20</sup>, Krausz C<sup>21</sup>, Gonzaga-Jauregui C<sup>22</sup>,  
6 Santibanez-Koref M<sup>3</sup>, Elliott DJ<sup>3</sup>, Vissers LELM<sup>1</sup>, Tüttelmann F<sup>17</sup>, O'Bryan MK<sup>4</sup>, Ramos L<sup>2</sup>, Xavier MJ<sup>3#</sup>, van der  
7 Heijden GW<sup>1,2#</sup>, Veltman JA<sup>3#</sup>

8

9 Affiliations:

10 1 Department of Human Genetics, Donders Institute for Brain, Cognition and Behaviour, Radboudumc,  
11 Nijmegen, the Netherlands

12 2 Department of Obstetrics and Gynaecology, Radboudumc, Nijmegen, the Netherlands

13 3 Biosciences Institute, Faculty of Medical Sciences, Newcastle University, Newcastle upon Tyne, United  
14 Kingdom

15 4 School of BioSciences, Faculty of Science, The University of Melbourne, Parkville, Australia

16 5 Department of Genetic Medicine, The Newcastle upon Tyne Hospitals NHS Foundation Trust, Newcastle  
17 upon Tyne, United Kingdom

18 6 Foundation for Research in Genetics and Endocrinology, Institute of Human Genetics, Ahmedabad, India

19 7 Department of Human Genetics, Radboud Institute for Molecular Life Sciences, Radboudumc, Nijmegen, the  
20 Netherlands

21 8 Division of Human Genetics, Center for Biomedical Research, Faculty of Medicine, Diponegoro University,  
22 Semarang, Indonesia

23 9 Newcastle Fertility Centre, The Newcastle upon Tyne Hospitals NHS Foundation Trust, Newcastle upon Tyne,  
24 United Kingdom

25 10 Department of Cellular Pathology, The Newcastle upon Tyne Hospitals NHS Foundation Trust, Newcastle  
26 upon Tyne, United Kingdom

27 11 Genomics Core Facility, Faculty of Medical Sciences, Newcastle University, Newcastle upon Tyne, United  
28 Kingdom

29 12 Bioinformatics Support Unit, Faculty of Medical Sciences, Newcastle University, Newcastle upon Tyne,  
30 United Kingdom

31 13 TFP Center of Reproductive Medicine Düsseldorf, Germany

32 14 Department of Urology, Radboudumc, Nijmegen, the Netherlands

33 15 Department of Pathology, Radboudumc, Nijmegen, the Netherlands

34 16 Division of Genetics, Oregon National Primate Research Center, Oregon Health & Science University,  
35 Beaverton, Oregon, United States of America

36 17 Institute of Reproductive Genetics, University of Münster, Münster, Germany

37 18 Centre of Reproductive Medicine and Andrology, Department of Clinical and Surgical Andrology, University  
38 Hospital Münster, Münster, Germany

39 19 Department of Surgery, Division of Urology, University of Utah School of Medicine, Salt Lake City, Utah,  
40 United States of America

41 20 Andrology Department, Fundació Puigvert, Universitat Autònoma de Barcelona, Instituto de Investigaciones  
42 Biomédicas Sant Pau (IIB-Sant Pau), Barcelona, Catalonia, Spain.

43 21 Department of Biomedical, Experimental and Clinical Sciences “Mario Serio”, University of Florence,  
44 Florence, Italy

45 22 Regeneron Genetics Center, Tarrytown, New York, United States of America

46 \* Joint first authors

47 # Joint last authors

48 **Introduction**

49 De novo mutations (DNMs) are known to play a prominent role in sporadic disorders with reduced fitness<sup>1</sup>. We  
50 hypothesize that DNMs play an important role in male infertility and explain a significant fraction of the  
51 genetic causes of this understudied disorder. To test this hypothesis, we performed trio-based exome-  
52 sequencing in a unique cohort of 185 infertile males and their unaffected parents. Following a systematic  
53 analysis, 29 of 145 rare protein altering DNMs were classified as possibly causative of the male infertility  
54 phenotype. We observed a significant enrichment of Loss-of-Function (LoF) DNMs in LoF-intolerant genes (p-  
55 value=1.00x10<sup>-5</sup>) as well as predicted pathogenic missense DNMs in missense-intolerant genes (p-  
56 value=5.01x10<sup>-4</sup>). One DNM gene identified, RBM5, is an essential regulator of male germ cell pre-mRNA  
57 splicing<sup>2</sup>. In a follow-up study, 5 rare pathogenic missense mutations affecting this gene were observed in a  
58 cohort of 2,279 infertile patients, with no such mutations found in a cohort of 5,784 fertile men (p-  
59 value=0.009). Our results provide the first evidence for the role of DNMs in severe male infertility and point to  
60 many new candidate genes affecting fertility.

61

62 **Main**

63 Male infertility contributes to approximately half of all cases of infertility and affects 7% of the male  
64 population. For the majority of these men the cause remains unexplained<sup>3</sup>. Despite a clear role for genetic  
65 causes in male infertility, there is a distinct lack of diagnostically relevant genes and at least 40% of all cases  
66 are classified as idiopathic<sup>3-6</sup>. Previous studies in other conditions with reproductive lethality, such as  
67 neurodevelopmental disorders, have demonstrated an important role for *de novo* mutations (DNMs) in their  
68 etiology<sup>1</sup>. In line with this, recurrent *de novo* chromosomal abnormalities play an important role in male  
69 infertility. Both azoospermia Factor (AZF) deletions on the Y chromosome as well as an additional X  
70 chromosome, resulting in Klinefelter syndrome, occur *de novo*. Collectively, these *de novo* events explaining up  
71 to 25% of all cases of non-obstructive azoospermia (NOA)<sup>3,6</sup>. Interestingly, in 1999 a DNM in the Y-  
72 chromosomal gene USP9Y was reported in a man with azoospermia<sup>7</sup>. Until now, however, a systematic  
73 analysis of the role of DNMs in male infertility had not been attempted. This is partly explained by a lack of

74 basic research in male reproductive health in general<sup>6,8</sup>, but also by the practical challenges of collecting  
75 parental samples for this disorder, which is typically diagnosed in adults.

76 In this study, we investigated the role of DNMs in 185 unexplained cases of oligozoospermia (<5 million sperm  
77 cells/ml; n=74) and azoospermia (n=111) by performing whole exome sequencing (WES) in all patients and  
78 their parents (see Supplementary Figure 1 and 2, Supplementary notes and tables for details on methods and  
79 clinical description). In total, we identified and validated 192 rare DNMs, including 145 protein altering DNMs.  
80 All *de novo* point mutations were autosomal, except for one on chromosome X, and all occurred in different  
81 genes (Supplementary Table 1). Two *de novo* copy number variations (CNVs) were also identified affecting a  
82 total of 7 genes (Supplementary Figure 3).

83 None of the 145-protein altering DNMs occurred in a gene already known for its involvement in autosomal  
84 dominant human male infertility. This is not unexpected as only 4 autosomal dominant genes have so far been  
85 linked to isolated male infertility in humans<sup>5,9</sup>. Broadly speaking, across genetic disorders, dominantly acting  
86 disease genes are usually intolerant to loss-of-function (LoF) mutations, as represented by a high pLI score<sup>10</sup>.  
87 The median pLI score of genes with a LoF DNM (n=17) in our cohort of male infertility cases was significantly  
88 higher than that of genes with 181 LoF DNMs identified in a cohort of 1,941 control cases from denovo-db  
89 v1.6.1<sup>11</sup> (pLI male infertility=0.80, pLI controls=3.75x10<sup>-5</sup>, p-value=1.00x10<sup>-5</sup>) (Figure 1). This observation  
90 indicates that LoF DNMs likely play an important role in male infertility, similar to what is known for  
91 developmental disorders and severe intellectual disability<sup>12,13</sup>. As an example, a heterozygous likely pathogenic  
92 frameshift DNM was observed in the LoF intolerant gene *GREB1L* (pLI=1) of Proband\_076. Homozygous *Greb1L*  
93 knock-out mice appear to be embryonic lethal, however, typical male infertility phenotypic features such as  
94 abnormal fetal testis morphology and decreased fetal testis volume are observed<sup>14</sup>. Interestingly, this patient  
95 has a reduced testis volume and severe oligospermia (Supplementary Notes Table 1). Nonsense and missense  
96 mutations in *GREB1L* in humans are known to cause renal agenesis<sup>15</sup> (OMIM: 617805), not known to be  
97 present in our patient. Of note, all previously reported damaging mutations in *GREB1L* causing renal agenesis  
98 are either maternally inherited or occurred *de novo*. This led the authors of one of these renal agenesis studies  
99 to speculate that disruption to *GREB1L* could cause infertility in males<sup>14</sup>. A recent WES study involving a cohort  
100 of 285 infertile men also noted several patients presenting with pathogenic mutations in genes with an  
101 associated systemic disease where male fertility is not always assessed<sup>16</sup>. We also assessed the damaging

102 effects of the two *de novo* CNVs by looking at the pLI score of the genes involved. Proband\_066 presented with  
103 a large 656 kb *de novo* deletion on chromosome 11, spanning 6 genes in total. This deletion partially  
104 overlapped with a deletion reported in 2014 in a patient with cryptorchidism and NOA<sup>17</sup>. Two genes affected in  
105 both patients, *QSER1* and *CSTF3*, are extremely LOF-intolerant with pLI scores of 1 and 0.98, respectively. In  
106 particular, *CSTF3* is highly expressed within the testis and is known to be involved in pre-mRNA 3' end cleavage  
107 and polyadenylation<sup>18</sup>.

108 To systematically evaluate and predict the likelihood of these DNMs causing male infertility and identify novel  
109 candidate disease genes, we assessed the predicted pathogenicity of all DNMs using three prediction methods  
110 based on SIFT<sup>19</sup>, MutationTaster<sup>20</sup> and PolyPhen2<sup>21</sup>. Using this approach, 84/145 protein altering DNM were  
111 predicted to be pathogenic, while the remaining 61 were predicted to be benign. To further analyse the impact  
112 of the variants on the genes affected, we looked at the missense Z-score of all 122 genes affected by a  
113 missense variant, which indicates the tolerance of genes to missense mutations<sup>22</sup>. Our data highlights a  
114 significantly higher missense Z-score in genes affected by a missense DNM predicted as pathogenic (n=63)  
115 when compared to genes affected by predicted benign (n=59) missense DNMs (p-value=5.01x10<sup>-4</sup>, Figure 2,  
116 Supplementary Figure 4). Furthermore, using the STRING database<sup>23</sup>, we found a significant enrichment of  
117 protein interactions amongst the 84 genes affected by a protein altering DNM predicted to be pathogenic (PPI  
118 enrichment p-value = 2.35 x 10<sup>-2</sup>, Figure 3). No such enrichment was observed for the genes highlighted as  
119 likely benign (n=61, PPI enrichment p-value=0.206) or those affected by synonymous DNMs (n=35, PPI  
120 enrichment p-value=0.992, Supplementary Figure 5). These two findings suggest that (1) the predicted  
121 pathogenic missense DNMs detected in our study affect genes sensitive to missense mutations, and (2) the  
122 proteins affected by predicted pathogenic DNMs share common biological functions.

123 The STRING network analysis also highlighted a central module of interconnected proteins with a significant  
124 enrichment of genes required for mRNA splicing (Supplementary Figure 6). The genes *U2AF2*, *HNRNPL*, *CDC5L*,  
125 *CWC27* and *RBM5* all contain predicted pathogenic DNMs and likely interact at a protein level during the  
126 mRNA splicing process. Pre-mRNA splicing allows gene functions to be expanded by creating alternative splice  
127 variants of gene products and is highly elaborated within the testis<sup>24</sup>. One of these genes, *RBM5* has been  
128 previously highlighted as an essential regulator of haploid male germ cell pre-mRNA splicing and male fertility<sup>2</sup>.  
129 Mice with a homozygous ENU-induced allele point mutation in *RBM5* present with azoospermia and germ cell

130 development arrest at round spermatids. Whilst in mice a homozygous mutation in *RBMS* is required to cause  
131 azoospermia, this may not be the case in humans as is well-documented for other genes<sup>25</sup>, including the  
132 recently reported male infertility gene *SYCP2*<sup>9</sup>. Of note, *RBMS* is a tumour suppressor in the lung<sup>26</sup>, with  
133 reduced expression affecting RNA splicing in patients with non-small cell lung cancer<sup>27</sup>. *HNRNPL* is another  
134 splicing factor affected by a possible pathogenic DNMs in our study. One study implicated a role for *HNRNPL* in  
135 patients with Sertoli cell only phenotype<sup>28</sup>. The remaining three mRNA splicing genes have not yet been  
136 implicated in human male infertility. However, mRNA for all three is expressed at medium to high levels in  
137 human germ cells and all are widely expressed during spermatogenesis<sup>29</sup>. Specifically, *CDC5L* is a component of  
138 the PRP19-CDC5L complex that forms an integral part of the spliceosome and is required for activating pre-  
139 mRNA splicing<sup>30</sup>, as is *CWC27*<sup>31</sup>. *U2AF2* plays a role in pre-mRNA splicing and 3'-end processing<sup>32</sup>. Interestingly,  
140 *CSTF3*, one of the genes affected by a *de novo* CNV in Proband\_066, affects the same mRNA pathway<sup>17</sup>.

141 Whilst DNMs most often cause dominant disease, they can contribute to recessive disease, usually in  
142 combination with an inherited variant on the trans allele. This was observed in Proband\_060, who carried a  
143 DNMs on the paternal allele, in trans with a maternally inherited variant in Testis and Ovary Specific PAZ  
144 Domain Containing 1 (*TOPAZ1*) (Supplementary Figure 7). *TOPAZ1* is a germ-cell specific gene which is highly  
145 conserved in vertebrates<sup>33</sup>. Studies in mice revealed that *Topaz1* plays a crucial role in spermatocyte, but not  
146 oocyte progression through meiosis<sup>34</sup>. In men, *TOPAZ1* is expressed in germ cells in both sexes<sup>29,35,36</sup>. Analysis  
147 of the testicular biopsy of this patient revealed a germ cell arrest in early spermiogenesis (Figure 4).

148 In addition to all systematic analyses described above, we evaluated the function of all DNMs to give  
149 each a final pathogenicity classification (Table 1, details in Material & Methods). Of all 145 DNMs, 29 affected  
150 genes linked to male reproduction and were classified as possibly causative. For replication purposes,  
151 unfortunately no other trio-based exome data are available for male infertility, although we note that a pilot  
152 study including 13 trios was recently published<sup>37</sup>. While this precluded a genuine replication study, we were  
153 able to study these candidate genes in exome datasets of infertile men (n=2,279), in collaboration with  
154 members of the International Male Infertility Genomics Consortium and the Geisinger Regeneron DiscovEHR  
155 collaboration<sup>38</sup>. The 33 candidate genes selected for this analysis include the 29 genes mentioned above and 4  
156 additional LoF intolerant genes carrying LoF DNMs with an 'unclear' final pathogenicity classification. For

157 comparison, we included an exome dataset from a cohort of 11,587 fertile men and women from  
158 Radboudumc.

159 In the additional infertile cohorts, we identified only 2 LoF mutations in our DNM LoF intolerant genes  
160 (Supplementary table 2). Next, we looked for an enrichment of rare predicted pathogenic missense mutations  
161 in these cohorts (Table 2). A burden test revealed a significant enrichment in the number of such missense  
162 mutations present in infertile men compared to fertile men in the *RBM5* gene (adjusted p-value=0.009). In this  
163 gene, 5 infertile men were found to carry a distinct rare pathogenic missense mutation, in addition to the  
164 proband with a *de novo* missense mutation (Supplementary figure 8, Supplementary table 3). Importantly, no  
165 such predicted pathogenic mutations were identified in men in the fertile cohort. In line with these results,  
166 *RBM5*, already highlighted above as an essential regulator of male germ cell pre-mRNA splicing and male  
167 infertility<sup>2</sup>, is highly intolerant to missense mutations (missense Z-score 4.17).

168 Given the predicted impact of these DNMs on spermatogenesis, we were interested in studying the parental  
169 origin of DNMs in our trio-cohort. We were able to phase 29% of all our DNMs using a combination of short-  
170 read WES and targeted long-read sequencing (Supplementary Table 4). In agreement with literature<sup>39-42</sup>, 72%  
171 of all DNMs occurred on the paternal allele. Interestingly, phasing of 8 likely causative DNMs showed that 6 of  
172 these were of paternal origin (75%). This suggests that DNMs with a deleterious effect on the future germline  
173 can escape negative selection in the paternal germline. This may be possible because the DNM occurred after  
174 the developmental window in which the gene is active, or the DNM may have affected a gene in the gamete's  
175 genome that is critical for somatic cells supporting the (future) germline. Transmission of pathogenic DNMs  
176 may also be facilitated by the fact that from spermatogonia onwards, male germ cells form cysts and share  
177 mRNAs and proteins<sup>43</sup>. As such, the interconnectedness of male germ cells, which is essential for their  
178 survival<sup>44</sup>, could mask detrimental effects of DNMs occurring during spermatogenesis.

179 In 2010, we published a pilot study pointing to a *de novo* paradigm for mental retardation<sup>45</sup> (now more  
180 appropriately termed developmental delay or intellectual disability). This work contributed to the widespread  
181 implementation of patient-parent WES studies in research and diagnostics for neurodevelopmental  
182 disorders<sup>46</sup>, accelerating disease gene identification and increasing the diagnostic yield for these disorders. The  
183 data presented here suggest that a similar benefit could be achieved from trio-based sequencing in male

184 infertility. This will not only help to increase the diagnostic yield for men with infertility but will also enhance  
185 our fundamental biological understanding of human reproduction and natural selection.

186

187

188

#### 189 **Data access**

190 Raw and processed exome sequencing data of our 185 patient-parent trios is available under controlled access  
191 and requires a Data Transfer Agreement from the European Genome-Phenome Archive (EGA) repository:  
192 EGAS00001004945.

193

#### 194 **Acknowledgements**

195 We are grateful for the participation of all patients and their parents in this study. We thank Laurens van de  
196 Wiel (Radboudumc), Sebastian Judd-Mole (Monash University), Arron Scott and Bryan Hepworth (Newcastle  
197 University) for technical support, and Margot J Wyrwoll (University of Münster) for help with handling MERGE  
198 samples and data. This project was funded by The Netherlands Organisation for Scientific Research (918-15-  
199 667) to JAV as well as an Investigator Award in Science from the Wellcome Trust (209451) to JAV, a grant from  
200 the Catherine van Tussenbroek Foundation to MSO, a UUKi Rutherford Fund Fellowship awarded to BJH and  
201 the German Research Foundation Clinical Research Unit 'Male Germ Cells' (DFG, CRU326) to CF and FT. This  
202 project was also supported in part by funding from the Australian National Health and Medical Research  
203 Council (APP1120356) to MKOB, by grants from the National Institutes of Health of the United States of  
204 America (R01HD078641 to D.F.C and K.I.A, P50HD096723 to D.F.C.) and from the Biotechnology and Biological  
205 Sciences Research Council (BB/S008039/1) to DJE.

206

#### 207 **Author contributions**



208 This study was designed by MSO, LELMV, LR and JAV. RMS, JG, HT and GWvdH provided all clinical data and  
209 performed the TESE histology and cytology analysis under supervision of LR, DDMB, ES, KF, KDH and KM. JC  
210 performed the exome sequencing with support from BA, and bioinformatics support was provided by MJX, GA,  
211 CG and SC. Sanger sequencing was performed by PfDV, HI, HES, LEB and BKSA. MSO and HES performed the  
212 SNV analyses with support from MJX, FKM performed CNV analysis with support from AM and MSK, and GSH  
213 and LEB performed the phasing. DJE, HS, BJH and MKOB provided support on the functional interpretation of  
214 mutations. DFC, LN, CF, SK, FT, KIA, ARE, CK, and CG-J were involved in the replication study. The first draft of  
215 the manuscript was prepared by MSO, HES, RMS, MJX, GWvdH, and JAV. All authors contributed to the final  
216 manuscript.

217

218 **References**

- 219 1. Veltman, J. A. & Brunner, H. G. De novo mutations in human genetic disease. *Nat. Rev. Genet.* **13**, 565–  
220 575 (2012).
- 221 2. O'Bryan, M. K. *et al.* RBM5 Is a Male Germ Cell Splicing Factor and Is Required for Spermatid  
222 Differentiation and Male Fertility. *PLoS Genet.* **9**, e1003628 (2013).
- 223 3. Krausz, C. & Riera-Escamilla, A. Genetics of male infertility. *Nat. Rev. Urol.* **15**, 369–384 (2018).
- 224 4. Tüttelmann, F., Ruckert, C. & Röpke, A. Disorders of spermatogenesis. *medizinische Genet.* **30**, 12–20  
225 (2018).
- 226 5. Oud, M. S. *et al.* A systematic review and standardized clinical validity assessment of male infertility  
227 genes. *Hum. Reprod.* **34**, 932–941 (2019).
- 228 6. Kasak, L. & Laan, M. Monogenic causes of non-obstructive azoospermia: challenges, established  
229 knowledge, limitations and perspectives. *Hum. Genet.* **140**, 135–154 (2021).
- 230 7. Sun, C. *et al.* An azoospermic man with a de novo point mutation in the Y-chromosomal gene USP9Y.  
231 *Nat. Genet.* **23**, 429–432 (1999).
- 232 8. De Jonge, C. & Barratt, C. L. R. The present crisis in male reproductive health: an urgent need for a  
233 political, social, and research roadmap. *Andrology* **7**, 762–768 (2019).
- 234 9. Schilit, S. L. P. *et al.* SYCP2 Translocation-Mediated Dysregulation and Frameshift Variants Cause  
235 Human Male Infertility. *Am. J. Hum. Genet.* **106**, 41–57 (2020).
- 236 10. Lek, M. *et al.* Analysis of protein-coding genetic variation in 60,706 humans. *Nature* **536**, 285–291  
237 (2016).
- 238 11. denovo-db, Seattle, WA (denovo-db.gs.washington.edu) [Aug 2020].
- 239 12. Gu, Y. *et al.* Three intellectual disability-associated de novo mutations in MECP2 identified by trio-WES  
240 analysis. *BMC Med. Genet.* **21**, 99 (2020).
- 241 13. Fritzen, D. *et al.* De novo FBXO11 mutations are associated with intellectual disability and behavioural  
242 anomalies. *Hum. Genet.* **137**, 401–411 (2018).
- 243 14. De Tomasi, L. *et al.* Mutations in GREB1L Cause Bilateral Kidney Agenesis in Humans and Mice. *Am. J.*  
244 *Hum. Genet.* **101**, 803–814 (2017).
- 245 15. Brophy, P. D. *et al.* A Gene Implicated in Activation of Retinoic Acid Receptor Targets Is a Novel Renal

- 246           Agenesis Gene in Humans. *Genetics* **207**, 215–228 (2017).
- 247   16.   Alhathal, N. *et al.* A genomics approach to male infertility. *Genet. Med.* **22**, 1967–1975 (2020).
- 248   17.   Seabra, C. M. *et al.* A novel Alu-mediated microdeletion at 11p13 removes WT1 in a patient with  
249       cryptorchidism and azoospermia. *Reprod. Biomed. Online* **29**, 388–391 (2014).
- 250   18.   Grozdanov, P. N., Li, J., Yu, P., Yan, W. & MacDonald, C. C. Cstf2t Regulates expression of histones and  
251       histone-like proteins in male germ cells. *Andrology* **6**, 605–615 (2018).
- 252   19.   Vaser, R., Adusumalli, S., Leng, S. N., Sikic, M. & Ng, P. C. SIFT missense predictions for genomes. *Nat.*  
253       *Protoc.* **11**, 1–9 (2016).
- 254   20.   Schwarz, J. M., Rödelberger, C., Schuelke, M. & Seelow, D. MutationTaster evaluates disease-causing  
255       potential of sequence alterations. *Nat. Methods* **7**, 575–576 (2010).
- 256   21.   Adzhubei, I. A. *et al.* A method and server for predicting damaging missense mutations. *Nat. Methods*  
257       **7**, 248–249 (2010).
- 258   22.   Samocha, K. E. *et al.* A framework for the interpretation of de novo mutation in human disease. *Nat.*  
259       *Genet.* **46**, 944–950 (2014).
- 260   23.   Szkarczyk, D. *et al.* The STRING database in 2017: quality-controlled protein–protein association  
261       networks, made broadly accessible. *Nucleic Acids Res.* **45**, D362–D368 (2017).
- 262   24.   Song, H., Wang, L., Chen, D. & Li, F. The Function of Pre-mRNA Alternative Splicing in Mammal  
263       Spermatogenesis. *Int. J. Biol. Sci.* **16**, 38–48 (2020).
- 264   25.   Elsea, S. H. & Lucas, R. E. The Mousetrap: What We Can Learn When the Mouse Model Does Not Mimic  
265       the Human Disease. *ILAR J.* **43**, 66–79 (2002).
- 266   26.   Jamsai, D. *et al.* In vivo evidence that RBM5 is a tumour suppressor in the lung. *Sci. Rep.* **7**, 16323  
267       (2017).
- 268   27.   Liang, H. *et al.* Differential Expression of RBM5, EGFR and KRAS mRNA and protein in non-small cell  
269       lung cancer tissues. *J. Exp. Clin. Cancer Res.* **31**, 36 (2012).
- 270   28.   Li, J. *et al.* HnRNPL as a key factor in spermatogenesis: Lesson from functional proteomic studies of  
271       azoospermia patients with sertoli cell only syndrome. *J. Proteomics* **75**, 2879–2891 (2012).
- 272   29.   Wang, M. *et al.* Single-Cell RNA Sequencing Analysis Reveals Sequential Cell Fate Transition during  
273       Human Spermatogenesis. *Cell Stem Cell* **23**, 599–614.e4 (2018).
- 274   30.   Ajuh, P. Functional analysis of the human CDC5L complex and identification of its components by mass

- 275 spectrometry. *EMBO J.* **19**, 6569–6581 (2000).
- 276 31. Brea-Fernández, A. J. *et al.* Expanding the clinical and molecular spectrum of the CWC27-related  
277 spliceosomopathy. *J. Hum. Genet.* **64**, 1133–1136 (2019).
- 278 32. Millevoi, S. *et al.* An interaction between U2AF 65 and CF Im links the splicing and 3' end processing  
279 machineries. *EMBO J.* **25**, 4854–4864 (2006).
- 280 33. Baillet, A. *et al.* TOPAZ1, a Novel Germ Cell-Specific Expressed Gene Conserved during Evolution across  
281 Vertebrates. *PLoS One* **6**, e26950 (2011).
- 282 34. Luangpraseuth-Prosper, A. *et al.* TOPAZ1, a germ cell specific factor, is essential for male meiotic  
283 progression. *Dev. Biol.* **406**, 158–171 (2015).
- 284 35. Guo, F. *et al.* The Transcriptome and DNA Methylome Landscapes of Human Primordial Germ Cells. *Cell*  
285 **161**, 1437–1452 (2015).
- 286 36. Li, L. *et al.* Single-Cell RNA-Seq Analysis Maps Development of Human Germline Cells and Gonadal  
287 Niche Interactions. *Cell Stem Cell* **20**, 858-873.e4 (2017).
- 288 37. Hodžić, A. *et al.* De novo mutations in idiopathic male infertility—A pilot study. *Andrology* **9**, 212–220  
289 (2021).
- 290 38. Dewey, F. E. *et al.* Distribution and clinical impact of functional variants in 50,726 whole-exome  
291 sequences from the DiscovEHR study. *Science (80-. )*. **354**, aaf6814 (2016).
- 292 39. Francioli, L. C. *et al.* Genome-wide patterns and properties of de novo mutations in humans. *Nat.*  
293 *Genet.* **47**, 822–826 (2015).
- 294 40. Rahbari, R. *et al.* Timing, rates and spectra of human germline mutation. *Nat. Genet.* **48**, 126–133  
295 (2016).
- 296 41. Goldmann, J. M. *et al.* Parent-of-origin-specific signatures of de novo mutations. *Nat. Genet.* **48**, 935–  
297 939 (2016).
- 298 42. Jónsson, H. *et al.* Parental influence on human germline de novo mutations in 1,548 trios from Iceland.  
299 *Nature* **549**, 519–522 (2017).
- 300 43. Braun, R. E., Behringer, R. R., Peschon, J. J., Brinster, R. L. & Palmiter, R. D. Genetically haploid  
301 spermatids are phenotypically diploid. *Nature* **337**, 373–376 (1989).
- 302 44. Greenbaum, M. P., Iwamori, T., Buchold, G. M. & Matzuk, M. M. Germ Cell Intercellular Bridges. *Cold*  
303 *Spring Harb. Perspect. Biol.* **3**, a005850–a005850 (2011).

304 45. Vissers, L. E. L. M. *et al.* A de novo paradigm for mental retardation. *Nat. Genet.* **42**, 1109–12 (2010).

305 46. Vissers, L. E. L. M., Gilissen, C. & Veltman, J. A. Genetic studies in intellectual disability and related  
306 disorders. *Nat. Rev. Genet.* **17**, 9–18 (2016).

307

308

309

310

311

312

313

314

315

316

317

318

319

320

321

322

323

324

325

326

327

328

329

330

331

332

333 **Figures and Tables**

334

335

336

337

338

339

340

341

342

343

344

345

346

347

348

349

350

351

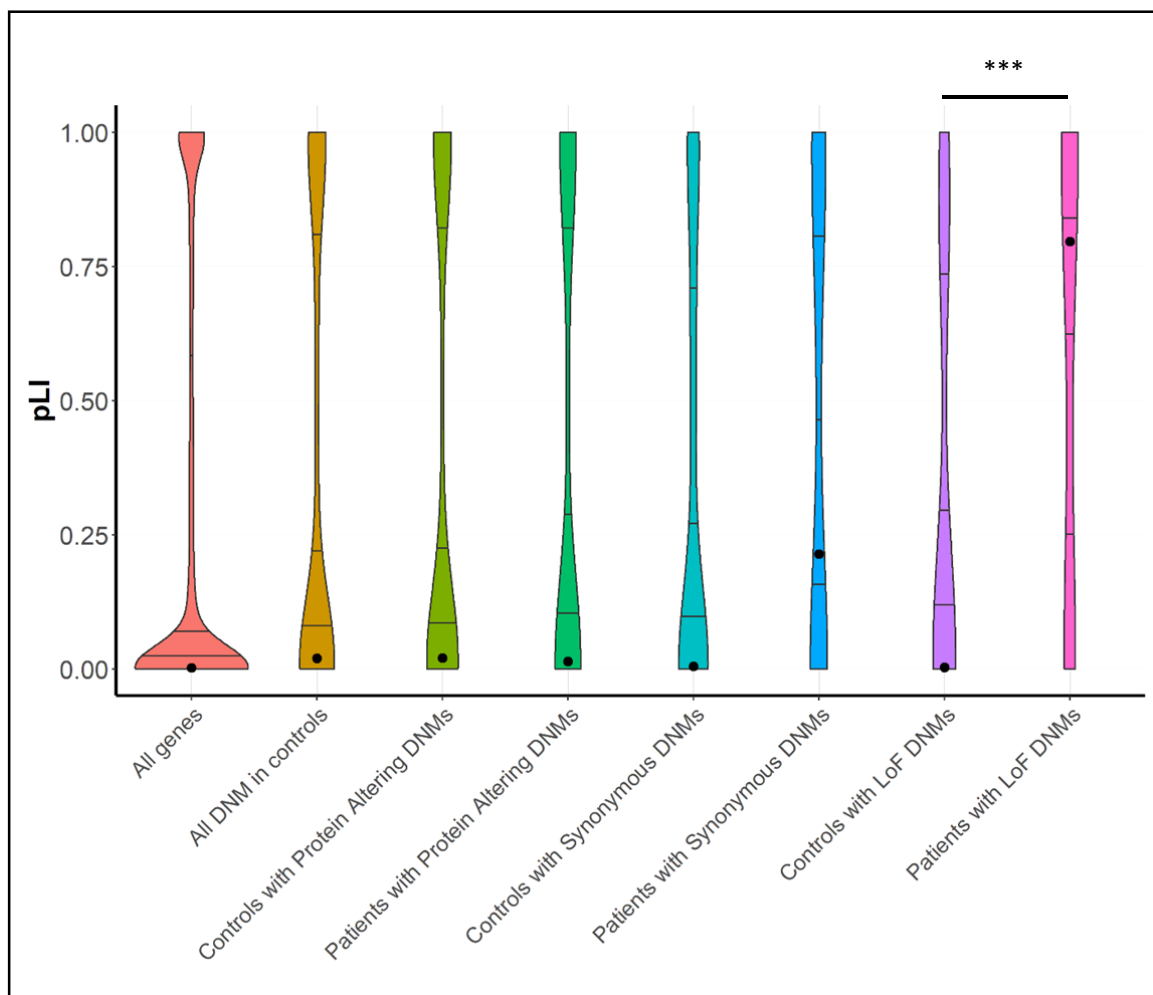

352

353 **Figure 1: Analysis of the intolerance to loss-of-function variation for DNM genes.** Violin plots represent the distribution of

354 the pLI scores of all genes in gnomAD, all genes affected by DNMs and all LoF DNM in this study and in a control population

355 (<http://denovo-db.gs.washington.edu/denovo-db/>). The observed median pLI score is displayed for each category as a

356 black circle. The closer the pLI score is to 1, the more intolerant to LoF variation a gene is<sup>10</sup>.

357 Comparison between LoF DNMs in our study and control populations shows a significance difference (p-value= $1.00 \times 10^{-5}$ ).

358

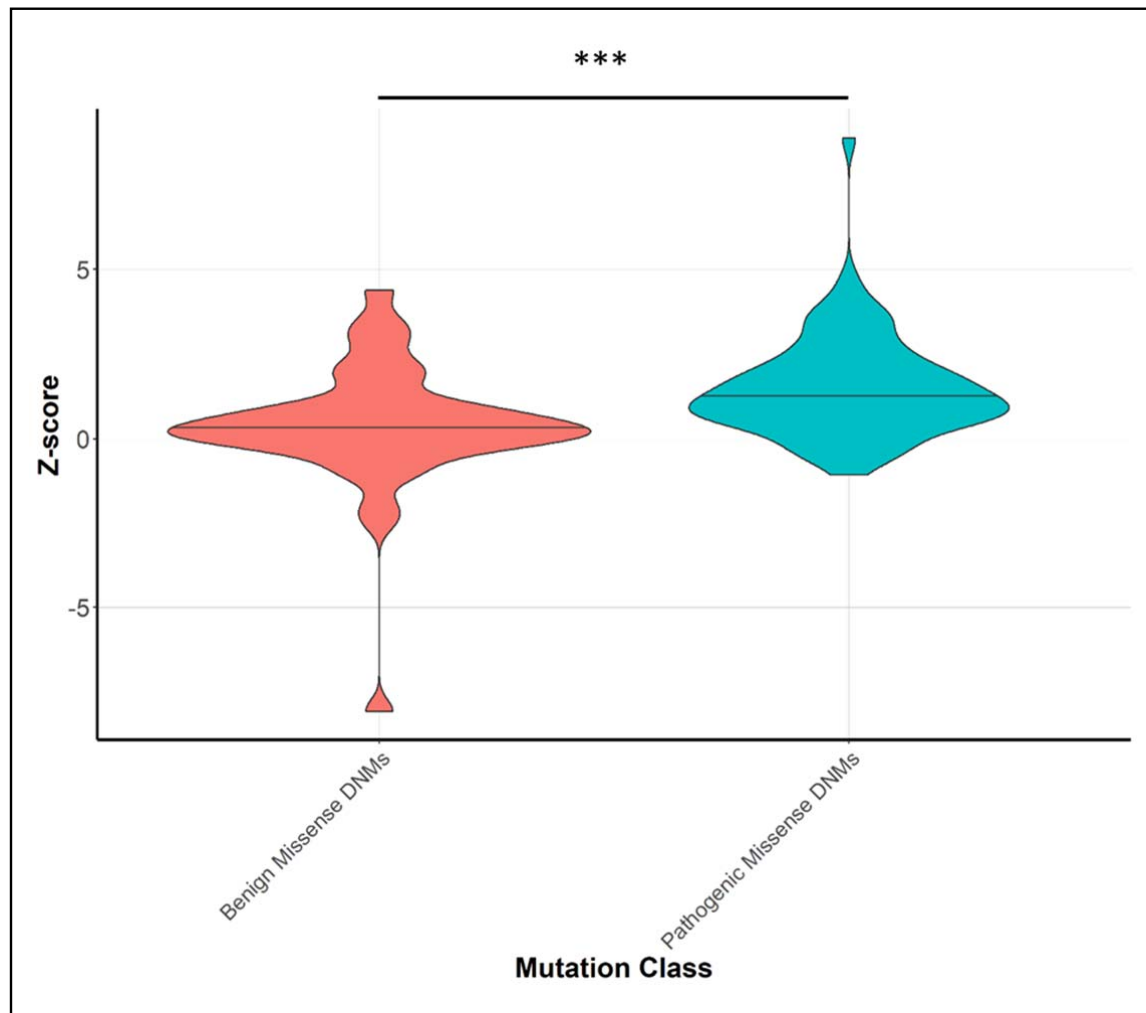

358 **Figure 2: Intolerance to missense variants for genes with a DNM.** Violin plots show the distribution of Z-scores of genes  
359 containing a missense DNM in our cohort, where an enrichment can be observed for predicated pathogenic DNMs in genes  
360 more intolerant to missense mutations based on their mean z-score with a p-value of  $5.01 \times 10^{-4}$ .

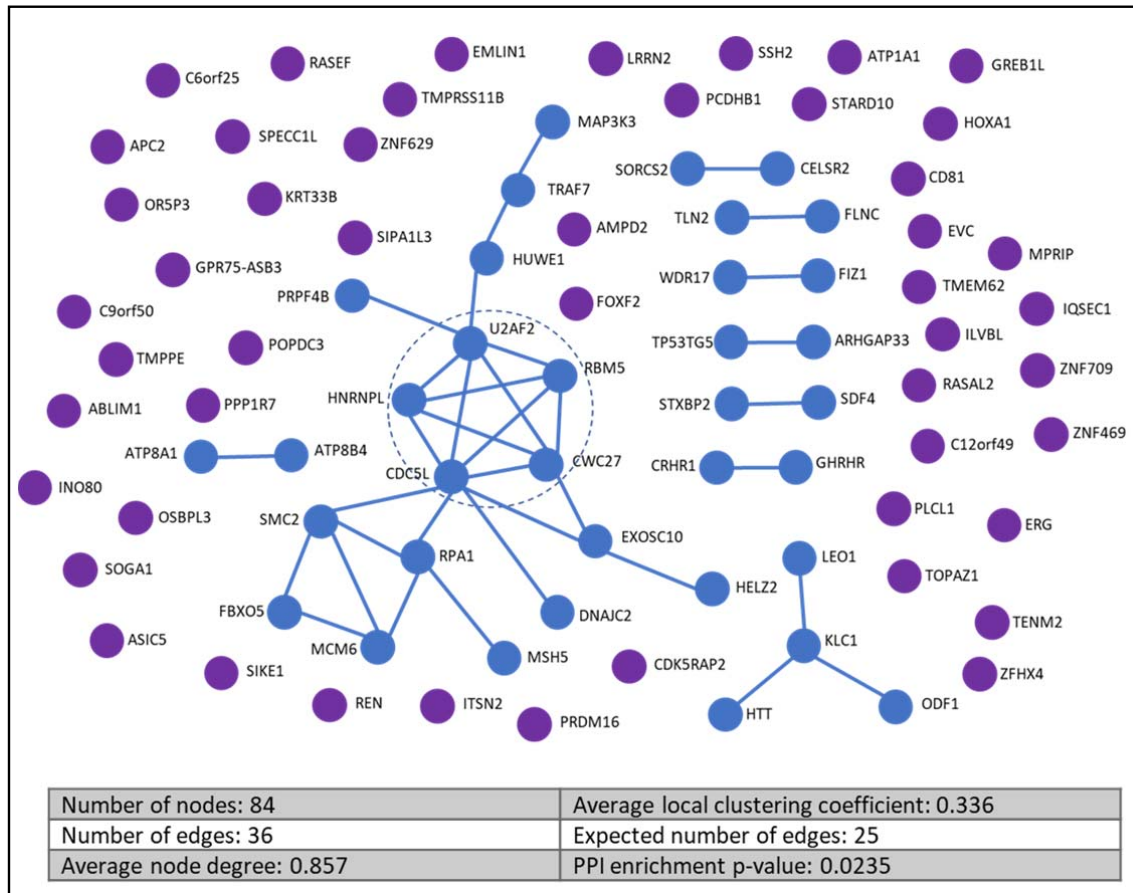

361 **Figure 3: Protein-protein interactions predicted for proteins encoded by damaging DNM genes.** A protein-protein  
 362 interaction analysis was performed for all 84 genes containing a DNM scored as damaging using the STRING tool<sup>23</sup>. A  
 363 significantly larger number of interactions is observed between our damaging DNM genes than is expected for a similar  
 364 sized dataset of randomly selected genes (PPI enrichment p-value  $2.35 \times 10^{-2}$ ) with the number of expected edges being 25  
 365 and the observed being 36. The central module of the main interaction network within the figure contains 5 genes which  
 366 are all involved in the process of mRNA splicing (Supplementary figure 6)



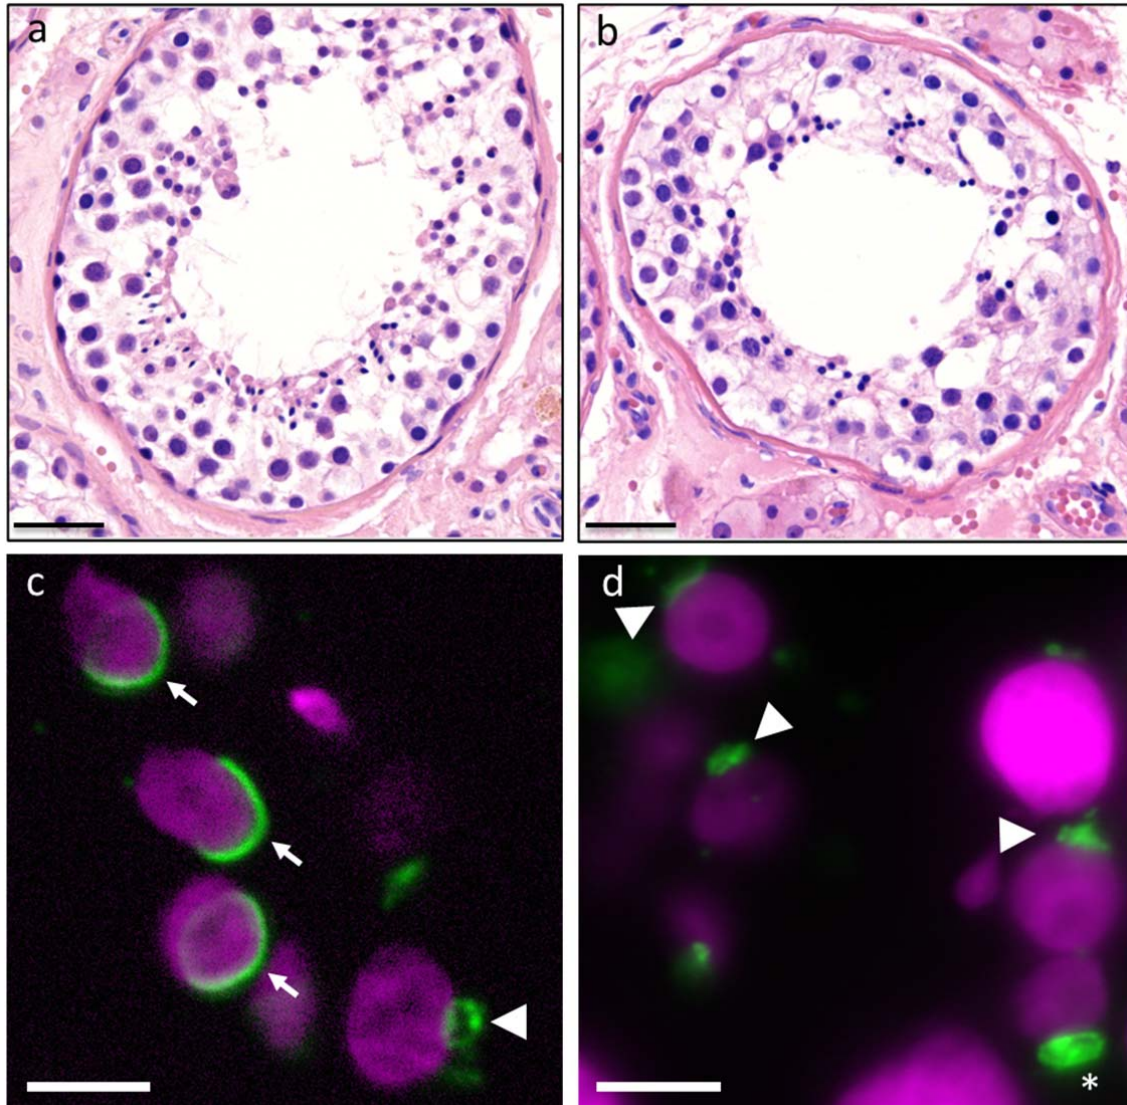

367

368 **Figure 4: Description of control and TOPAZ1 proband testis histology and aberrant acrosome formation: (a,b):** H&E  
369 stainings of **(a)** control and **(b)** Proband\_060 with DNMs in TOPAZ1 gene. The epithelium of the seminiferous tubules in the  
370 TOPAZ1 proband show reduced numbers of germ cells and an absence of elongating spermatids. **(c,d):** immunofluorescent  
371 labelling of DNA (magenta) and the acrosome (green) in control sections **(c)** and TOPAZ1 proband sections **(d)**. **(c)** The  
372 arrowhead indicates the acrosome in an early round spermatid and the arrows the acrosome in elongating spermatids.  
373 Spreading of the acrosome and nuclear elongation are hallmarks of spermatid maturation. **(d)** No acrosomal spreading (see  
374 arrowheads) or nuclear elongation is observed in the TOPAZ1 proband. The asterisk indicates an example of progressive  
375 acrosome accumulation without spreading. Size bar in a, b: 40 μm, c, d: 5 μm.

376

377

378

379

380

381

382 **Table 1: *De novo* mutation classification summary.**

|                     | Possibly causative | Unclear | Unlikely causative | Not Causative | Total |
|---------------------|--------------------|---------|--------------------|---------------|-------|
| Missense            | 21                 | 38      | 50                 | 13            | 122   |
| Frameshift          | 4                  | 8       | 1                  | 0             | 13    |
| Stop gained         | 1                  | 3       | 0                  | 0             | 4     |
| In-frame indels     | 3                  | 1       | 1                  | 1             | 6     |
| Splice site variant | 0                  | 0       | 0                  | 11            | 11    |
| Synonymous          | 0                  | 0       | 0                  | 36            | 36    |
| TOTAL               | 29                 | 50      | 52                 | 61            | 192   |

383 A total of 192 rare DNMs were classified based on pathogenicity scores as well as functional data into 4 categories,  
384 'Possibly causative', 'Unclear', 'Unlikely Causative' and 'Not causative'.

385

386

387

388

389

390

391

392

393

394

395

396

397

398

399 **Table 2: Rare potentially pathogenic missense mutations in exome data from various cohorts of infertile men and fertile control cohorts.**

| Gene     | Missense Z-score | NIJ/NCL Cohort of Patient-Parent Trios (n=185) | NIJ/NCL Cohort of Infertile Men (Singleton) (n=145) | MERGE Cohort of Infertile Men (n=887) | GEMINI Cohort of NOA Men (n=926) | Geisinger-Regeneron DiscovEHR Cohort of Infertile Men (n=88) | Italian Cohort of NOA Men (n=48) | Total Infertile Men (n=2,279) | Fertile Dutch Men (n=5,784) | Fertile Dutch Women (n=5,803) | Burden test Infertile vs Fertile Men (Bonf) | Burden test Fertile Men vs Women (Bonf) |
|----------|------------------|------------------------------------------------|-----------------------------------------------------|---------------------------------------|----------------------------------|--------------------------------------------------------------|----------------------------------|-------------------------------|-----------------------------|-------------------------------|---------------------------------------------|-----------------------------------------|
| ABLIM1   | 1.62             | 1                                              | 1                                                   | 1                                     | 1                                | 1                                                            | 0                                | 5                             | 1                           | 1                             | 0.15                                        | 1                                       |
| ATP1A1   | 6.22             | 0                                              | 0                                                   | 0                                     | 1                                | 0                                                            | 0                                | 1                             | 0                           | 1                             | 1                                           | 1                                       |
| CDC5L    | 2.78             | 1                                              | 1                                                   | 1                                     | 3                                | 0                                                            | 0                                | 6                             | 2                           | 4                             | 0.15                                        | 1                                       |
| CDK5RAP2 | -0.37            | 1                                              | 0                                                   | 1                                     | 1                                | 0                                                            | 0                                | 3                             | 5                           | 5                             | 1                                           | 1                                       |
| HUWE1    | 8.87             | 1                                              | 0                                                   | 2                                     | 0                                | 0                                                            | 0                                | 3                             | 0                           | 0                             | 0.41                                        | 1                                       |
| INO80    | 3.53             | 1                                              | 0                                                   | 1                                     | 0                                | 0                                                            | 0                                | 2                             | 3                           | 3                             | 1                                           | 1                                       |
| MAP3K3   | 2.04             | 1                                              | 0                                                   | 2                                     | 0                                | 0                                                            | 0                                | 3                             | 1                           | 2                             | 1                                           | 1                                       |
| MCM6     | 1.07             | 1                                              | 1                                                   | 1                                     | 3                                | 0                                                            | 0                                | 6                             | 4                           | 8                             | 0.64                                        | 1                                       |
| PPP1R7   | 1.86             | 0                                              | 0                                                   | 0                                     | 1                                | 0                                                            | 0                                | 1                             | 1                           | 1                             | 1                                           | 1                                       |
| QSER1    | 1.34             | 0                                              | 1                                                   | 1                                     | 0                                | 0                                                            | 0                                | 2                             | 8                           | 1                             | 1                                           | 0.38                                    |
| RASAL2   | 1.40             | 0                                              | 1                                                   | 1                                     | 2                                | 1                                                            | 0                                | 5                             | 25                          | 13                            | 1                                           | 0.94                                    |
| RBM5     | 4.17             | 1                                              | 2                                                   | 2                                     | 0                                | 1                                                            | 0                                | 6                             | 0                           | 2                             | 0.009                                       | 1                                       |
| RPA1     | 1.22             | 1                                              | 0                                                   | 0                                     | 1                                | 0                                                            | 0                                | 2                             | 3                           | 3                             | 1                                           | 1                                       |
| SDF4     | 0.53             | 1                                              | 0                                                   | 0                                     | 0                                | 0                                                            | 1                                | 2                             | 1                           | 1                             | 1                                           | 1                                       |
| SOGA1    | 2.27             | 1                                              | 0                                                   | 1                                     | 1                                | 0                                                            | 0                                | 3                             | 15                          | 5                             | 1                                           | 0.47                                    |
| STARD10  | 1.34             | 1                                              | 0                                                   | 2                                     | 0                                | 0                                                            | 0                                | 3                             | 4                           | 5                             | 1                                           | 1                                       |
| TENM2    | 3.30             | 1                                              | 0                                                   | 2                                     | 2                                | 0                                                            | 2                                | 7                             | 16                          | 16                            | 1                                           | 1                                       |
| ZFH4     | 1.01             | 0                                              | 0                                                   | 3                                     | 3                                | 0                                                            | 0                                | 6                             | 14                          | 8                             | 1                                           | 1                                       |

400 The genes included in this analysis were among the strongest candidate genes affected by a DNM (either missense or LoF mutation). The missense Z-score is included here to indicate a  
401 relative (in)tolerance to missense mutation<sup>22</sup>. For the original NIJ/NCL discovery cohort, only the missense DNMs are included in this Table (7 of these genes were affected by a LoF DNM). A  
402 burden test was done to compare the total number of predicted pathogenic missense mutations observed in the infertile vs. fertile men, as well as between fertile men and fertile women  
403 (Fisher's Exact test, adjusted for multiple testing following Bonferroni correction).
